# Supplementary material for: The First Symbiont-Free Genome Sequence of Marine Red Alga, Susabi-nori (Pyropia yezoensis)
Source: PLoS One. 2013 Mar 11;8(3):e57122. doi: 10.1371/journal.pone.0057122 (PMC3594237; doi:10.1371/journal.pone.0057122)
Supplement: Table S1 — Species used for gene prediction and comparison. (XLS) [file pone.0057122.s005.xls]

## Sheet: Sheet1
Table S1. Species used for gene prediction and comparison.
Taxon	Species	Source	URL or accession no.
Rhodophyta	Cyanidioschyzon merolae 10D	Cyanidioschyzon merolae Genome Project	http://merolae.biol.s.u-tokyo.ac.jp/download/
Cryptophyta	Guillardia theta	Joint Genome Institute (JGI), v 1.0	http://genome.jgi.doe.gov/
Heterokonta	Aureococcus anophagefferens	JGI, v 1.0	http://genome.jgi.doe.gov/
	Fragilariopsis cylindrus	JGI, v 1.0	http://genome.jgi.doe.gov/
	Phaeodactylum tricornutum	JGI, v 2.0	http://genome.jgi.doe.gov/
	Phytophthora capsici	JGI, v 11.0	http://genome.jgi.doe.gov/
	Phytophthora ramorum	JGI, v 1.1	http://genome.jgi.doe.gov/
	Phytophthora sojae	JGI, v 3.0	http://genome.jgi.doe.gov/
	Pseudo-nitzschia multiseries	JGI, v 1.0	http://genome.jgi.doe.gov/
	Thalassiosira pseudonana	JGI, v 3.0	http://genome.jgi.doe.gov/
	Ectocarpus siliculosus	Genoscope, VIB/UGent	https://bioinformatics.psb.ugent.be/gdb/ectocarpus/
Rhizaria	Bigelowiella natans	JGI, v 1.0	http://genome.jgi.doe.gov/
Viridiplanta	Arabidopsis thaliana	TAIR10, NCBI	NC_003070.9, NC_003071.7, NC_003074.8, NC_003075.7, NC_003076.8
	Chlamydomonas reinhardtii	JGI, v 4.3	http://genome.jgi.doe.gov/
	Chlorella NC64A	JGI, v 1.0	http://genome.jgi.doe.gov/
	Micromonas CCMP1545	JGI, v 3.0	http://genome.jgi.doe.gov/
	Micromonas RCC299	JGI, v 3.0	http://genome.jgi.doe.gov/
	Oryza sativa	IRGSP 1.0, RAP-DB	http://rapdb.dna.affrc.go.jp/download/irgsp1.html
	Ostreococcus lucimarinus	JGI, v 2.0	http://genome.jgi.doe.gov/
	Ostreococcus RCC809	JGI, v 2.0	http://genome.jgi.doe.gov/
	Ostreococcus tauri	JGI, v 4.0	http://genome.jgi.doe.gov/
	Physcomitrella patens	JGI, v 1.6	http://genome.jgi.doe.gov/
	Volvox carteri	JGI, v 2	http://genome.jgi.doe.gov/
Cyanobacteria	Nostoc PCC7120	NCBI	NC_003272
	Synechocystis PCC6803	NCBI	NC_000911
	Trichodesmium erythraeum IMS101	NCBI	NC_008312
nucleomorph	Bigelowiella natans	NCBI	NC_010004, NC_010005, NC_010006
	Cryptomonas paramecium	NCBI	CP002172, CP002173, CP002174
	Guillardia theta	NCBI	NC_002752, NC_002753, NC_002751
	Hemiselmis andresenii	NCBI	NC_009977, NC_009978, NC_009979
